# Supplementary material for: Population Genomic Analysis of North American Eastern Wolves (Canis lycaon) Supports Their Conservation Priority Status
Source: Genes (Basel). 2018 Dec 4;9(12):606. doi: 10.3390/genes9120606 (PMC6316216; doi:10.3390/genes9120606)
Supplement: Supplementary file 1 [file genes-09-00606-s001.zip › TableS1_revision.xlsx]

## Sheet: Table S1
														Geneland probablities (n=281 sample set)				Geneland probablities (n=122 sample set)
ID#	Species	Province/State	Location# in Fig1	Sex	Collection Date	Latitude	Longitude	% missingness out of 16587 SNPs	Assignment (eastern/gray/coyote)	Post-probability Reference	DAPC cluster	NJ tree	TreeMix group	Pop1	Pop2	Pop3	Pop4	Pop1	Pop2	Pop3	% missingness out of 14248 SNPs +dogs
6205	Coyote	Maine	1	Male	Prior to 2005	45.3801	-69.1159	0.063604	0.093/0/0.907	Reference	Coyote	Coyote	Northeast_CLA	0.219206	0.597055	0.113444	0.0702945				0.0581134
6206	Coyote	Maine	1	Female	Prior to 2005	45.3801	-69.1159	0.0551637	0.079/0/0.921	Reference	Coyote	Coyote	Northeast_CLA	0.219206	0.597055	0.113444	0.0702945				0.0491297
6207	Coyote	Maine	1	Female	Prior to 2005	45.3801	-69.1159	0.0767468	0/0/1	Reference	Coyote	Coyote	Northeast_CLA	0.219206	0.597055	0.113444	0.0702945				0.0692027
6208	Coyote	Maine	1	Male	Prior to 2005	45.3801	-69.1159	0.10255	0/0/1	Reference	Coyote	Coyote	Northeast_CLA	0.219206	0.597055	0.113444	0.0702945				0.0955924
6209	Coyote	Maine	1	Male	Prior to 2005	45.3801	-69.1159	0.14445	0/0/1	Reference	Coyote	Coyote	Northeast_CLA	0.219206	0.597055	0.113444	0.0702945				0.133703
6210	Coyote	Maine	1	Male	Prior to 2005	45.3801	-69.1159	0.0648098	0/0/1	Reference	Coyote	Coyote	Northeast_CLA	0.219206	0.597055	0.113444	0.0702945				0.0562184
6213	Coyote	Maine	1	Male	Prior to 2005	45.3801	-69.1159	0.0551637	0.04/0/0.96	Reference	Coyote	Coyote	Northeast_CLA	0.219206	0.597055	0.113444	0.0702945				0.0505334
6214	Coyote	Maine	1	Male	Prior to 2005	45.3801	-69.1159	0.0634835	0.041/0/0.959	Reference	Coyote	Coyote	Northeast_CLA	0.219206	0.597055	0.113444	0.0702945				0.0581836
6215	Coyote	Maine	1	Male	Prior to 2005	45.3801	-69.1159	0.0847049	0/0/1	Reference	Coyote	Coyote	Northeast_CLA	0.219206	0.597055	0.113444	0.0702945				0.0783268
6218	Coyote	Maine	1	Female	Prior to 2005	45.3801	-69.1159	0.122506	0/0/1	Reference	Coyote	Coyote	Northeast_CLA	0.219206	0.597055	0.113444	0.0702945				0.111805
6219	Coyote	Maine	1	Unknown	Prior to 2005	45.3801	-69.1159	0.117863	0/0/1	Reference	Coyote	Coyote	Northeast_CLA	0.219206	0.597055	0.113444	0.0702945				0.110051
6223	Coyote	Maine	1	Male	Prior to 2005	45.3801	-69.1159	0.0271297	0.081/0/0.919	Reference	Coyote	Coyote	Northeast_CLA	0.219206	0.597055	0.113444	0.0702945				0.0242841
6224	Coyote	Maine	1	Unknown	Prior to 2005	45.3801	-69.1159	0.0775306	0/0/1	Reference	Coyote	Coyote	Northeast_CLA	0.219206	0.597055	0.113444	0.0702945				0.0703958
6246	Coyote	Maine	1	Female	Prior to 2005	45.3801	-69.1159	0.0716224	0.059/0.003/0.938	Reference	Coyote	Coyote	Northeast_CLA	0.219206	0.597055	0.113444	0.0702945				0.0659742
6247	Coyote	Maine	1	Female	Prior to 2005	45.3801	-69.1159	0.129017	0.196/0/0.804		Coyote	Coyote	Northeast_CLA	0.219206	0.597055	0.113444	0.0702945				0.119175
6249	Coyote	Maine	1	Unknown	Prior to 2005	45.3801	-69.1159	0.114789	0/0/1	Reference	Coyote	Coyote	Northeast_CLA	0.219206	0.597055	0.113444	0.0702945				0.0982594
2199	Coyote	Minnesota	2	Female		46.28	-92.63	0.00892265	0/0/1	Reference	Coyote	Coyote	Great_Lakes_CLA	0.630858	0.1242	0.166965	0.077977				0.00793094
2200	Coyote	Minnesota	2	Male		46.2	-92.63	0.00295412	0/0/1	Reference	Coyote	Coyote	Great_Lakes_CLA	0.630858	0.1242	0.166965	0.077977				0.00217574
2201	Coyote	Minnesota	2	Male		46.12	-92.8	0.0136251	0/0/1	Reference	Coyote	Coyote	Great_Lakes_CLA	0.630858	0.1242	0.166965	0.077977				0.0115806
2202	Coyote	Minnesota	2	Female		46.37	-92.44	0.00144692	0/0/1	Reference	Coyote	Coyote	Great_Lakes_CLA	0.630858	0.1242	0.166965	0.077977				0.00140371
6147	Coyote	New Brunswick	3	Unknown	Prior to 2005	46.7956	-64.9649	0.12341	0/0/1	Reference	Coyote	Coyote	Northeast_CLA	0.219206	0.597055	0.113444	0.0702945				0.111805
6148	Coyote	New Brunswick	3	Unknown	Prior to 2005	46.7956	-64.9649	0.0362332	0/0/1	Reference	Coyote	Coyote	Northeast_CLA	0.219206	0.597055	0.113444	0.0702945				0.0338995
6149	Coyote	New Brunswick	3	Unknown	Prior to 2005	46.7956	-64.9649	0.0792187	0/0/1	Reference	Coyote	Coyote	Northeast_CLA	0.219206	0.597055	0.113444	0.0702945				0.072712
6117	Coyote	New Brunswick	4	Unknown	Prior to 2005	45.8373	-66.437	0.0741545	0/0/1	Reference	Coyote	Coyote	Northeast_CLA	0.219206	0.597055	0.113444	0.0702945				0.064781
6141	Coyote	New Brunswick	4	Unknown	Prior to 2005	45.8373	-66.437	0.159221	0/0/1	Reference	Coyote	Coyote	Northeast_CLA	0.219206	0.597055	0.113444	0.0702945				0.147459
6143	Coyote	New Brunswick	4	Unknown	Prior to 2005	45.8373	-66.437	0.164466	0/0/1	Reference	Coyote	Coyote	Northeast_CLA	0.219206	0.597055	0.113444	0.0702945				0.148723
6131	Coyote	New Brunswick	5	Unknown	Prior to 2005	45.6409	-65.7018	0.143486	0/0/1	Reference	Coyote	Coyote	Northeast_CLA	0.219206	0.597055	0.113444	0.0702945				0.130194
6134	Coyote	New Brunswick	5	Unknown	Prior to 2005	45.6409	-65.7018	0.113221	0/0/1	Reference	Coyote	Coyote	Northeast_CLA	0.219206	0.597055	0.113444	0.0702945				0.103453
6183	Coyote	Prince Edward Island	6	Unknown	Prior to 2005	46.5107	-63.4168	0.116296	0/0/1	Reference	Coyote	Coyote	Northeast_CLA	0.219206	0.597055	0.113444	0.0702945				0.107103
6859	Coyote	New Jersey	7	Unknown	2015	44.3849	-80.228	0.0651715	0.036/0/0.964	Reference	Coyote	Coyote	Northeast_CLA	0.219206	0.597055	0.113444	0.0702945				0.0558675
6860	Coyote	New Jersey	7	Unknown	2016	44.3849	-80.228	0.0208597	0/0/1	Reference	Coyote	Coyote	Northeast_CLA	0.219206	0.597055	0.113444	0.0702945				0.0182482
6862	Coyote	New Jersey	7	Unknown	2016	44.3849	-80.228	0.0594441	0/0/1	Reference	Coyote	Coyote	Northeast_CLA	0.219206	0.597055	0.113444	0.0702945				0.0513054
6863	Coyote	New Jersey	7	Unknown	2016	44.3849	-80.228	0.236872	0/0/1	Reference	Coyote	Coyote	Northeast_CLA	0.219206	0.597055	0.113444	0.0702945				0.223821
6286	Coyote	New York	8	Unknown	Prior to 2005	44.6337	-74.4574	0.0766263	0/0/1	Reference	Coyote	Coyote	Northeast_CLA	0.219206	0.597055	0.113444	0.0702945	0.947507	0	0.0524925	0.0708871
5978	Coyote	New York	9	Unknown		46.0144	-77.3357	0.0743956	0/0/1	Reference	Coyote	Coyote	Northeast_CLA	0.0720871	0.161076	0.598464	0.168374				0.0694133
5987	Coyote	New York	9	Unknown		46.0144	-77.3357	0.155604	0/0/1	Reference	Coyote	Coyote	Northeast_CLA	0.0720871	0.161076	0.598464	0.168374				0.152162
5988	Coyote	New York	9	Unknown		46.0144	-77.3357	0.0809067	0/0/1	Reference	Coyote	Coyote	Northeast_CLA	0.0720871	0.161076	0.598464	0.168374				0.074607
6011	Coyote	Ontario	10	Unknown	Prior to 2002	44.6145	-75.7636	0.00192922	0.099/0.028/0.873		Coyote	Coyote	Northeast_CLA	0.219206	0.597055	0.113444	0.0702945	0.947507	0	0.0524925	0.00196519
6013	Coyote	Ontario	10	Unknown	Prior to 2002	44.6145	-75.7636	0.000301441	0/0/1	Reference	Coyote	Coyote	Northeast_CLA	0.219206	0.597055	0.113444	0.0702945	0.947507	0	0.0524925	0.000350926
6016	Coyote	Ontario	10	Unknown	Prior to 2002	44.6145	-75.7636	0.056068	0.012/0/0.988	Reference	Coyote	Coyote	Northeast_CLA	0.219206	0.597055	0.113444	0.0702945	0.947507	0	0.0524925	0.0457608
6017	Coyote	Ontario	10	Unknown	Prior to 2002	44.6145	-75.7636	0.0179659	1/0/0		Eastern wolf	Eastern wolf	Northeast_CLA	0.219206	0.597055	0.113444	0.0702945	0.947507	0	0.0524925	0.0157917
6018	Coyote	Ontario	10	Unknown	Prior to 2002	44.6145	-75.7636	0.0342437	0/0/1	Reference	Coyote	Coyote	Northeast_CLA	0.219206	0.597055	0.113444	0.0702945	0.947507	0	0.0524925	0.0251263
6023	Coyote	Ontario	10	Unknown	Prior to 2002	44.6145	-75.7636	0.00699343	0.145/0/0.855		Coyote	Gray wolf	Northeast_CLA	0.219206	0.597055	0.113444	0.0702945	0.947507	0	0.0524925	0.00470241
6024	Coyote	Ontario	10	Unknown	Prior to 2002	44.6145	-75.7636	0.034304	0.3/0/0.7		Coyote	Coyote	Northeast_CLA	0.219206	0.597055	0.113444	0.0702945	0.947507	0	0.0524925	0.0294778
6025	Coyote	Ontario	10	Unknown	Prior to 2002	44.6145	-75.7636	0.0113342	0.234/0/0.766		Coyote	Coyote	Northeast_CLA	0.219206	0.597055	0.113444	0.0702945	0.947507	0	0.0524925	0.00912409
2234	Coyote	Ontario	11	Male		47.6025	-79.8508	0.205522	0/0/1	Reference	Coyote	Coyote	Ontario_CLA	0.0720871	0.161076	0.598464	0.168374	0.803699	0.0524925	0.143809	0.192659
2235	Coyote	Ontario	11	Male		47.8198	-79.7761	0.336649	//												0.328397
2242	Coyote	Ontario	11	Female		47.6169	-79.8616	0.171218	0.248/0/0.752		Coyote	Coyote	Ontario_CLA	0.217926	0.590525	0.120871	0.0706786	0.922467	0.0282564	0.0492764	0.161075
2246	Coyote	Ontario	11	Male		47.5012	-79.7008	0.16953	0.16/0/0.84		Coyote	Coyote	Ontario_CLA	0.0720871	0.161076	0.598464	0.168374	0.947507	0.00310131	0.0493912	0.15925
2283	Coyote	Ontario	12	Male		44.8696	-77.6875	0.00301441	0.278/0/0.722		Coyote	Coyote	SE_Ontario_CLA	0.219206	0.597055	0.113444	0.0702945	0.947507	0	0.0524925	0.0023863
2285	Coyote	Ontario	12	Male		44.9741	-78.7416	0.0992946	0.219/0/0.781		Coyote	Coyote	SE_Ontario_CLA	0.219078	0.592574	0.118822	0.0695262	0.947507	0.00068918	0.0518034	0.0892757
2286	Coyote	Ontario	12	Male		43.6167	-81.5399	0.00108519	0/0/1	Reference	Coyote	Coyote	SE_Ontario_CLA	0.219206	0.597055	0.113444	0.0702945	0.947507	0	0.0524925	0.000772038
2287	Coyote	Ontario	12	Male		43.9302	-81.2138	0.00825948	0.085/0/0.915	Reference	Coyote	Coyote	SE_Ontario_CLA	0.219206	0.597055	0.113444	0.0702945	0.947507	0	0.0524925	0.00800112
2288	Coyote	Ontario	12	Male		43.9265	-81.2907	0.000783746	0/0/1	Reference	Coyote	Coyote	SE_Ontario_CLA	0.219206	0.597055	0.113444	0.0702945	0.947507	0	0.0524925	0.000491297
2289	Coyote	Ontario	12	Female		43.9339	-81.2514	0.0207391	0/0/1	Reference	Coyote	Coyote	SE_Ontario_CLA	0.219206	0.597055	0.113444	0.0702945	0.947507	0	0.0524925	0.0186693
2290	Coyote	Ontario	12	Male		43.9584	-81.2214	0.000482305	0/0/1	Reference	Coyote	Coyote	SE_Ontario_CLA	0.219206	0.597055	0.113444	0.0702945	0.947507	0	0.0524925	0.000421112
2291	Coyote	Ontario	12	Female		43.9527	-81.2457	0.0634835	0/0/1	Reference	Coyote	Coyote	SE_Ontario_CLA	0.219206	0.597055	0.113444	0.0702945	0.947507	0	0.0524925	0.0582538
2292	Coyote	Ontario	12	Female		43.9598	-81.2212	0.00066317	0/0/1	Reference	Coyote	Coyote	SE_Ontario_CLA	0.219206	0.597055	0.113444	0.0702945	0.947507	0	0.0524925	0.000772038
2293	Coyote	Ontario	12	Male		43.8926	-81.2351	0.0280943	0.095/0/0.905	Reference	Coyote	Coyote	SE_Ontario_CLA	0.219206	0.597055	0.113444	0.0702945	0.947507	0	0.0524925	0.0242139
2294	Coyote	Ontario	12	Male		43.7163	-81.6247	0.00217037	0/0/1	Reference	Coyote	Coyote	SE_Ontario_CLA	0.219206	0.597055	0.113444	0.0702945	0.947507	0	0.0524925	0.00182482
2295	Coyote	Ontario	12	Male		43.7195	-81.6483	0.045397	0/0/1	Reference	Coyote	Coyote	SE_Ontario_CLA	0.219206	0.597055	0.113444	0.0702945	0.947507	0	0.0524925	0.0400758
2296	Coyote	Ontario	12	Male		43.7823	-81.683	0.0238138	0.067/0.043/0.89		Coyote	Coyote	SE_Ontario_CLA	0.219206	0.597055	0.113444	0.0702945	0.947507	0	0.0524925	0.0204941
2298	Coyote	Ontario	12	Female		43.735	-81.5924	0.0015072	0.124/0/0.876		Coyote	Coyote	SE_Ontario_CLA	0.219206	0.597055	0.113444	0.0702945	0.947507	0	0.0524925	0.00112296
2299	Coyote	Ontario	12	Male		43.7325	-81.5918	0.0285163	0/0/1	Reference	Coyote	Coyote	SE_Ontario_CLA	0.219206	0.597055	0.113444	0.0702945	0.947507	0	0.0524925	0.023863
2300	Coyote	Ontario	12	Female		43.7448	-81.5915	0.0325556	0.109/0/0.891		Coyote	Coyote	SE_Ontario_CLA	0.219206	0.597055	0.113444	0.0702945	0.947507	0	0.0524925	0.0281443
2301	Coyote	Ontario	12	Male		43.3783	-81.7085	0.0619762	0.044/0/0.956	Reference	Coyote	Coyote	SE_Ontario_CLA	0.219206	0.597055	0.113444	0.0702945	0.947507	0	0.0524925	0.0574116
2302	Coyote	Ontario	12	Female		43.7373	-81.5915	0.00066317	0.081/0/0.919	Reference	Coyote	Coyote	SE_Ontario_CLA	0.219206	0.597055	0.113444	0.0702945	0.947507	0	0.0524925	0.000561482
2303	Coyote	Ontario	12	Female		43.5564	-81.4777	0.0119371	0/0/1	Reference	Coyote	Coyote	SE_Ontario_CLA	0.219206	0.597055	0.113444	0.0702945	0.947507	0	0.0524925	0.0108787
2304	Coyote	Ontario	12	Male		43.4531	-81.4645	0.0168204	0/0/1	Reference	Coyote	Coyote	SE_Ontario_CLA	0.219206	0.597055	0.113444	0.0702945	0.947507	0	0.0524925	0.0150197
2305	Coyote	Ontario	12	Female		43.5265	-81.3931	0.0335805	0.094/0/0.906	Reference	Coyote	Coyote	SE_Ontario_CLA	0.219206	0.597055	0.113444	0.0702945	0.947507	0	0.0524925	0.0313026
2306	Coyote	Ontario	12	Male		43.5083	-81.4602	0.0497377	0/0/1	Reference	Coyote	Coyote	SE_Ontario_CLA	0.219206	0.597055	0.113444	0.0702945	0.947507	0	0.0524925	0.0440764
2309	Coyote	Ontario	12	Female		44.4197	-76.0761	0.114789	0/0/1	Reference	Coyote	Coyote	SE_Ontario_CLA	0.219206	0.597055	0.113444	0.0702945	0.947507	0	0.0524925	0.106892
2311	Coyote	Ontario	12	Male		45.0524	-74.7454	0.00729487	0/1/0		Gray wolf	Gray wolf	SE_Ontario_CLA	0.0806658	0.115237	0.122151	0.681946	0	0.0524925	0.947507	0.00652723
1635	Coyote	Pennsylvania	13	Male	2014	41.6557	-75.2897	0.0901308	0/0/1	Reference	Coyote	Coyote	Northeast_CLA	0.219206	0.597055	0.113444	0.0702945				0.0842925
1638	Coyote	Pennsylvania	13	Male	2014	41.8077	-75.8253	0.0256225	0/0/1	Reference	Coyote	Coyote	Northeast_CLA	0.219206	0.597055	0.113444	0.0702945				0.0242139
1645	Coyote	Pennsylvania	13	Female	2014	41.4992	-76.0474	0.387834	//												0.37486
1686	Coyote	Pennsylvania	13	Male	2014	40.6921	-80.3659	0.217942	0/0/1	Reference	Coyote	Coyote	Northeast_CLA	0.219206	0.597055	0.113444	0.0702945				0.206625
1693	Coyote	Pennsylvania	13	Female	2014	40.9106	-77.8674	0.306143	//												0.291339
1700	Coyote	Pennsylvania	13	Male	2014	41.2194	-77.6158	0.216193	0/0/1	Reference	Coyote	Coyote	Northeast_CLA	0.219206	0.597055	0.113444	0.0702945				0.206485
1701	Coyote	Pennsylvania	13	Female	2014	41.2194	-77.6158	0.32001	//												0.306429
1709	Coyote	Pennsylvania	13	Female	2014	41.787	-77.2918	0.341533	//												0.324747
1710	Coyote	Pennsylvania	13	Male	2014	41.7994	-76.5158	0.0276723	0.033/0/0.967	Reference	Coyote	Coyote	Northeast_CLA	0.219206	0.597055	0.113444	0.0702945				0.0244947
1714	Coyote	Pennsylvania	13	Male	2014	40.6921	-80.3659	0.243082	0/0.049/0.951	Reference	Coyote	Coyote	Northeast_CLA	0.219206	0.597055	0.113444	0.0702945				0.230278
1715	Coyote	Pennsylvania	13	Male	2014	41.7396	-77.9027	0.377947	//												0.363419
1718	Coyote	Pennsylvania	13	Female	2014	39.8555	-80.199	0.317176	//												0.3032
1719	Coyote	Pennsylvania	13	Male	2014	40.9649	-78.4444	0.451679	//												0.437956
1720	Coyote	Pennsylvania	13	Male	2014	41.4433	-78.6513	0.114246	0/0/1	Reference	Coyote	Coyote	Northeast_CLA	0.219206	0.597055	0.113444	0.0702945				0.105559
1726	Coyote	Pennsylvania	13	Female	2014	41.0402	-76.652	0.217158	0/0/1	Reference	Coyote	Coyote	Northeast_CLA	0.219206	0.597055	0.113444	0.0702945				0.204801
1732	Coyote	Pennsylvania	13	Male	2014	41.0402	-76.652	0.123591	0/0/1	Reference	Coyote	Coyote	Northeast_CLA	0.219206	0.597055	0.113444	0.0702945				0.114753
1733	Coyote	Pennsylvania	13	Male	2014	41.0402	-76.652	0.013384	0/0/1	Reference	Coyote	Coyote	Northeast_CLA	0.219206	0.597055	0.113444	0.0702945				0.01137
1735	Coyote	Pennsylvania	13	Female	2014	41.7994	-76.5158	0.118828	0.099/0/0.901	Reference	Coyote	Coyote	Northeast_CLA	0.219206	0.597055	0.113444	0.0702945				0.111524
1737	Coyote	Pennsylvania	13	Female	2014	41.787	-77.2918	0.392416	//												0.381457
1739	Coyote	Pennsylvania	13	Male	2014	40.5134	-78.705	0.184783	0.027/0/0.973	Reference	Coyote	Coyote	Northeast_CLA	0.219206	0.597055	0.113444	0.0702945				0.172796
1740	Coyote	Pennsylvania	13	Male	2014	40.4598	-76.7652	0.0183276	0/0/1	Reference	Coyote	Coyote	Northeast_CLA	0.219206	0.597055	0.113444	0.0702945				0.0150197
1742	Coyote	Pennsylvania	13	Female	2014	41.6708	-80.1001	0.293905	//												0.279057
1745	Coyote	Pennsylvania	13	Female	2014	41.4992	-76.0474	0.0904323	0/0/1	Reference	Coyote	Coyote	Northeast_CLA	0.219206	0.597055	0.113444	0.0702945				0.0819062
1746	Coyote	Pennsylvania	13	Male	2014	41.4992	-76.0474	0.125158	0/0/1	Reference	Coyote	Coyote	Northeast_CLA	0.219206	0.597055	0.113444	0.0702945				0.115385
1747	Coyote	Pennsylvania	13	Female	2014	40.9955	-80.3393	0.020498	0/0.04/0.96	Reference	Coyote	Coyote	Northeast_CLA	0.219206	0.597055	0.113444	0.0702945				0.0183885
1753	Coyote	Pennsylvania	13	Female	2014	39.9768	-79.0339	0.373726	//												0.358436
1756	Coyote	Pennsylvania	13	Male	2014	39.9768	-79.0339	0.035148	0/0/1	Reference	Coyote	Coyote	Northeast_CLA	0.219206	0.597055	0.113444	0.0702945				0.0316536
1758	Coyote	Pennsylvania	13	Male	2014	41.1591	-75.9904	0.360825	//												0.342715
1759	Coyote	Pennsylvania	13	Female	2014	41.1591	-75.9904	0.0308073	0/0/1	Reference	Coyote	Coyote	Northeast_CLA	0.219206	0.597055	0.113444	0.0702945				0.0258282
1761	Coyote	Pennsylvania	13	Male	2014	41.1614	-79.4334	0.140652	0/0.02/0.98	Reference	Coyote	Coyote	Northeast_CLA	0.219206	0.597055	0.113444	0.0702945				0.12865
1768	Coyote	Pennsylvania	13	Female	2014	41.7396	-77.9027	0.0613131	0/0/1	Reference	Coyote	Coyote	Northeast_CLA	0.219206	0.597055	0.113444	0.0702945				0.0536917
1769	Coyote	Pennsylvania	13	Female	2014	40.6543	-79.069	0.161211	0/0/1	Reference	Coyote	Coyote	Northeast_CLA	0.219206	0.597055	0.113444	0.0702945				0.152372
1774	Coyote	Pennsylvania	13	Female	2014	41.2892	-80.2582	0.0717429	0/0/1	Reference	Coyote	Coyote	Northeast_CLA	0.219206	0.597055	0.113444	0.0702945				0.0633071
1781	Coyote	Pennsylvania	13	Male	2014	42.0041	-80.0361	0.0760234	0/0/1	Reference	Coyote	Coyote	Northeast_CLA	0.219206	0.597055	0.113444	0.0702945				0.0680095
1785	Coyote	Pennsylvania	13	Female	2014	41.8431	-79.3138	0.0376198	0/0/1	Reference	Coyote	Coyote	Northeast_CLA	0.219206	0.597055	0.113444	0.0702945				0.033338
1789	Coyote	Pennsylvania	13	Male	2014	41.0737	-77.1677	0.0352083	0/0/1	Reference	Coyote	Coyote	Northeast_CLA	0.219206	0.597055	0.113444	0.0702945				0.0296884
1790	Coyote	Pennsylvania	13	Female	2014	42.0041	-80.0361	0.149032	0/0.009/0.991	Reference	Coyote	Coyote	Northeast_CLA	0.219206	0.597055	0.113444	0.0702945				0.133071
1793	Coyote	Pennsylvania	13	Female	2014	42.0041	-80.0361	0.116778	0.104/0.008/0.889		Coyote	Coyote	Northeast_CLA	0.219206	0.597055	0.113444	0.0702945				0.100716
1794	Coyote	Pennsylvania	13	Male	2014	41.8431	-79.3138	0.252065	//												0.234138
1795	Coyote	Pennsylvania	13	Female	2014	41.8431	-79.3138	0.167722	0/0.049/0.951	Reference	Coyote	Coyote	Northeast_CLA	0.219206	0.597055	0.113444	0.0702945				0.156864
1796	Coyote	Pennsylvania	13	Male	2014	41.1593	-78.9849	0.0928438	0/0/1	Reference	Coyote	Coyote	Northeast_CLA	0.219206	0.597055	0.113444	0.0702945				0.0816957
2664	Coyote	Pennsylvania	13	Unknown	2015	40.4827	-79.9891	0.0554651	0/0/1	Reference	Coyote	Coyote	Northeast_CLA	0.219206	0.597055	0.113444	0.0702945				0.0485682
2665	Coyote	Pennsylvania	13	Unknown	2015	41.1614	-79.4334	0.0306264	0/0/1	Reference	Coyote	Coyote	Northeast_CLA	0.219206	0.597055	0.113444	0.0702945				0.0268108
2671	Coyote	Pennsylvania	13	Unknown	2015	42.0041	-80.0361	0.161452	0/0/1	Reference	Coyote	Coyote	Northeast_CLA	0.219206	0.597055	0.113444	0.0702945				0.154337
2341	Coyote	Wisconsin	14	Male		46.641	-91.8631	0.0601676	0/0/1	Reference	Coyote	Coyote	Great_Lakes_CLA	0.630858	0.1242	0.166965	0.077977				0.0550253
2342	Coyote	Wisconsin	14	Male		46.3311	-91.2708	0.21336	0/0/1	Reference	Coyote	Coyote	Great_Lakes_CLA	0.630858	0.1242	0.166965	0.077977				0.201291
2203	Coyote	Minnesota	15	Female		45.0991	-93.9229	0.00168807	0/0/1	Reference	Coyote	Coyote	Great_Lakes_CLA	0.630858	0.1242	0.166965	0.077977				0.00140371
2204	Coyote	Minnesota	15	Female		45.0991	-93.9229	0.00633026	0/0/1	Reference	Coyote	Coyote	Great_Lakes_CLA	0.630858	0.1242	0.166965	0.077977				0.00498316
2205	Coyote	Minnesota	15	Male		45.0991	-93.9229	0.0127811	0/0.087/0.913	Reference	Coyote	Coyote	Great_Lakes_CLA	0.630858	0.1242	0.166965	0.077977				0.0109489
2206	Coyote	Minnesota	15	Female		45.0991	-93.9229	0.00120576	0/0/1	Reference	Coyote	Coyote	Great_Lakes_CLA	0.630858	0.1242	0.166965	0.077977				0.00126334
2207	Coyote	Minnesota	15	Female		45.0991	-93.9229	0.00259239	0/0/1	Reference	Coyote	Coyote	Great_Lakes_CLA	0.630858	0.1242	0.166965	0.077977				0.00245649
2208	Coyote	Minnesota	15	Male		45.0991	-93.9229	0.00403931	0/0/1	Reference	Coyote	Coyote	Great_Lakes_CLA	0.630858	0.1242	0.166965	0.077977				0.00393038
2209	Coyote	Minnesota	15	Male		45.0991	-93.9229	0.00554651	0/0/1	Reference	Coyote	Coyote	Great_Lakes_CLA	0.630858	0.1242	0.166965	0.077977				0.00568501
2210	Coyote	Minnesota	15	Male		45.0991	-93.9229	0.00120576	0/0/1	Reference	Coyote	Coyote	Great_Lakes_CLA	0.630858	0.1242	0.166965	0.077977				0.00105278
6054	Dog	Ontario																			0.105699
6056	Dog	Ontario																			0.0598681
6058	Dog	Ontario																			0.347207
6075	Dog	Ontario																			0.205783
6076	Dog	Ontario																			0.0235121
6077	Dog	Ontario																			0.0464627
6101	Dog	Ontario		Male	2010																0.139528
6102	Dog	Ontario		Female	2010																0.0506036
6104	Dog	Ontario		Female	2010																0.354506
6106	Dog	Ontario																			0.999017
6109	Dog	Ontario		Male	2011																0.101207
6110	Dog	Ontario		Female	2011																0.288251
6111	Dog	Ontario		Female	2011																0.391072
2090	Eastern wolf	Ontario	1	Male	2004	45.2364	-78.2547	0.115693	1/0/0	Reference	Eastern wolf	Eastern wolf	APP	0.0720871	0.161076	0.598464	0.168374	0	0.0524925	0.947507	0.10991
2091	Eastern wolf	Ontario	1	Female	2004	45.7174	-77.8204	0.0362935	1/0/0	Reference	Eastern wolf	Eastern wolf	APP	0.0720871	0.161076	0.598464	0.168374	0	0.0524925	0.947507	0.0324256
2094	Eastern wolf	Ontario	1	Male	2005	45.9747	-77.7235	0.0339422	1/0/0	Reference	Eastern wolf	Eastern wolf	APP	0.0720871	0.161076	0.598464	0.168374	0	0.0524925	0.947507	0.0315834
2096	Eastern wolf	Ontario	1	Male	2002	45.3815	-78.3675	0.0342437	1/0/0	Reference	Eastern wolf	Eastern wolf	APP	0.0720871	0.161076	0.598464	0.168374	0	0.0524925	0.947507	0.030671
2097	Eastern wolf	Ontario	1	Female	2005	45.7107	-77.6588	0.0166395	0.822/0.178/0		Eastern wolf	Gray wolf	APP	0.0720871	0.161076	0.598464	0.168374	0	0.0524925	0.947507	0.0137563
2100	Eastern wolf	Ontario	1	Female	2005	45.4296	-78.2909	0.0585398	0.756/0/0.244		Eastern wolf	Gray wolf	APP	0.0720871	0.161076	0.598464	0.168374	0	0.0524925	0.947507	0.0531303
2101	Eastern wolf	Ontario	1	Male	2005	45.6738	-78.3022	0.0194128	1/0/0	Reference	Eastern wolf	Eastern wolf	APP	0.0720871	0.161076	0.598464	0.168374	0	0.0524925	0.947507	0.0182482
2133	Eastern wolf	Ontario	1	Female	2003	45.9582	-77.7412	0.0298426	1/0/0	Reference	Eastern wolf	Eastern wolf	APP	0.0720871	0.161076	0.598464	0.168374	0	0.0524925	0.947507	0.0280741
7270	Eastern wolf	Ontario	1	Male	2002	45.7659	-77.5728	0.0292398	1/0/0	Reference	Eastern wolf	Eastern wolf	APP	0.0720871	0.161076	0.598464	0.168374	0	0.0524925	0.947507	0.0273021
7271	Eastern wolf	Ontario	1	Male	2003	45.6386	-78.1906	0.109905	1/0/0	Reference	Eastern wolf	Eastern wolf	APP	0.0720871	0.161076	0.598464	0.168374	0	0.0524925	0.947507	0.103734
7272	Eastern wolf	Ontario	1	Male	2003	45.6552	-78.488	0.0324953	1/0/0	Reference	Eastern wolf	Eastern wolf	APP	0.0720871	0.161076	0.598464	0.168374	0	0.0524925	0.947507	0.029548
7273	Eastern wolf	Ontario	1	Male	2003	45.6887	-78.7443	0.0391873	1/0/0	Reference	Eastern wolf	Eastern wolf	APP	0.0720871	0.161076	0.598464	0.168374	0	0.0524925	0.947507	0.0346715
7274	Eastern wolf	Ontario	1	Male		45.6634	-78.4099	0.00717429	1/0/0	Reference	Eastern wolf	Eastern wolf	APP	0.0720871	0.161076	0.598464	0.168374	0	0.0524925	0.947507	0.00610612
7275	Eastern wolf	Ontario	1	Female	2004	45.4345	-78.4822	0.00862121	1/0/0	Reference	Eastern wolf	Eastern wolf	APP	0.0720871	0.161076	0.598464	0.168374	0	0.0524925	0.947507	0.00870298
7276	Eastern wolf	Ontario	1	Male	2005	45.5437	-77.8319	0.0312896	1/0/0	Reference	Eastern wolf	Eastern wolf	APP	0.0720871	0.161076	0.598464	0.168374	0	0.0524925	0.947507	0.0277934
7277	Eastern wolf	Ontario	1	Female	2005	45.9396	-77.8178	0.00554651	1/0/0	Reference	Eastern wolf	Eastern wolf	APP	0.0720871	0.161076	0.598464	0.168374	0	0.0524925	0.947507	0.00519371
7278	Eastern wolf	Ontario	1	Male	2006	45.8066	-78.5218	0.0104901	1/0/0	Reference	Eastern wolf	Eastern wolf	APP	0.0720871	0.161076	0.598464	0.168374	0	0.0524925	0.947507	0.00947501
7279	Eastern wolf	Ontario	1	Female	2003	45.925	-77.7555	0.0252607	1/0/0	Reference	Eastern wolf	Eastern wolf	APP	0.0720871	0.161076	0.598464	0.168374	0	0.0524925	0.947507	0.0235121
7280	Eastern wolf	Ontario	1	Male	2003	45.983	-77.994	0.00934467	1/0/0	Reference	Eastern wolf	Eastern wolf	APP	0.0720871	0.161076	0.598464	0.168374	0	0.0524925	0.947507	0.00793094
7281	Eastern wolf	Ontario	1	Female	2003	45.9749	-77.9363	0.0361729	1/0/0	Reference	Eastern wolf	Eastern wolf	APP	0.0720871	0.161076	0.598464	0.168374	0	0.0524925	0.947507	0.0340399
7282	Eastern wolf	Ontario	1	Female	2003	45.8625	-78.3988	0.0173027	1/0/0	Reference	Eastern wolf	Eastern wolf	APP	0.0720871	0.161076	0.598464	0.168374	0	0.0524925	0.947507	0.0156513
7283	Eastern wolf	Ontario	1	Male	2003	45.7996	-78.2982	0.0136854	0.624/0.376/0		Eastern wolf	Eastern wolf	APP	0.0720871	0.161076	0.598464	0.168374	0	0.0524925	0.947507	0.0120017
7284	Eastern wolf	Ontario	1	Female	2003	45.7962	-78.299	0.0116356	1/0/0	Reference	Eastern wolf	Eastern wolf	APP	0.0720871	0.161076	0.598464	0.168374	0	0.0524925	0.947507	0.0106682
7285	Eastern wolf	Ontario	1	Male	2003	45.8144	-78.1185	0.0475071	1/0/0	Reference	Eastern wolf	Eastern wolf	APP	0.0720871	0.161076	0.598464	0.168374	0	0.0524925	0.947507	0.0435851
7286	Eastern wolf	Ontario	1	Female	2004	45.9579	-77.7485	0.00705372	1/0/0	Reference	Eastern wolf	Eastern wolf	APP	0.0720871	0.161076	0.598464	0.168374	0	0.0524925	0.947507	0.00603593
7287	Eastern wolf	Ontario	1	Male	2004	45.9369	-77.6742	0.0197142	1/0/0	Reference	Eastern wolf	Eastern wolf	APP	0.0720871	0.161076	0.598464	0.168374	0	0.0524925	0.947507	0.0180376
7288	Eastern wolf	Ontario	1	Female	2004	45.717	-77.8153	0.00946524	1/0/0	Reference	Eastern wolf	Eastern wolf	APP	0.0720871	0.161076	0.598464	0.168374	0	0.0524925	0.947507	0.00863279
7289	Eastern wolf	Ontario	1	Female	2006	45.7081	-78.1318	0.0203171	0.829/0.171/0		Eastern wolf	Eastern wolf	APP	0.0720871	0.161076	0.598464	0.168374	0	0.0524925	0.947507	0.0181078
7290	Eastern wolf	Ontario	2	Unknown	2004	44.9728	-78.8247	0.0179659	1/0/0	Reference	Eastern wolf	Eastern wolf	APP	0.0722151	0.161076	0.598464	0.168246	0	0.0524925	0.947507	0.0160724
7291	Eastern wolf	Ontario	2	Unknown	2014	45.033	-78.858	0.0227889	0.731/0/0.269		Eastern wolf	Eastern wolf	APP	0.0720871	0.161076	0.598464	0.168374	0.000114863	0.0523777	0.947507	0.0214767
2163	Gray wolf	Michigan	1	Male		45.5584	-87.3375	0.169892	0/1/0	Reference	Gray wolf	Gray wolf	Great_Lakes_CLU	0.0775928	0.118054	0.120871	0.683483				0.161567
2154	Gray wolf	Michigan	2	Female		46.1948	-85.3313	0.00940496	0/1/0	Reference	Gray wolf	Gray wolf	Great_Lakes_CLU	0.0775928	0.118054	0.120871	0.683483				0.00849242
2155	Gray wolf	Michigan	2	Male		45.8755	-84.8101	0.180081	0.068/0.932/0	Reference	Gray wolf	Gray wolf	Great_Lakes_CLU	0.0775928	0.118054	0.120871	0.683483				0.176165
2160	Gray wolf	Michigan	2	Female		46.1221	-84.3736	0.0724664	0/1/0	Reference	Gray wolf	Gray wolf	Great_Lakes_CLU	0.0775928	0.118054	0.120871	0.683483				0.0659742
2162	Gray wolf	Michigan	2	Male		46.0209	-84.8731	0.0938084	0/1/0	Reference	Gray wolf	Gray wolf	Great_Lakes_CLU	0.0775928	0.118054	0.120871	0.683483				0.0880124
2145	Gray wolf	Michigan	3	Female		46.1381	-88.939	0.274552	//												0.266774
2146	Gray wolf	Michigan	3	Male		46.3839	-88.5646	0.154519	0/1/0	Reference	Gray wolf	Gray wolf	Great_Lakes_CLU	0.0775928	0.118054	0.120871	0.683483				0.148933
2151	Gray wolf	Michigan	4	Female		46.1655	-86.126	0.00596853	0/1/0	Reference	Gray wolf	Gray wolf	Great_Lakes_CLU	0.0775928	0.118054	0.120871	0.683483				0.00505334
2152	Gray wolf	Michigan	4	Male		46.1801	-86.147	0.00500392	0/1/0	Reference	Gray wolf	Gray wolf	Great_Lakes_CLU	0.0775928	0.118054	0.120871	0.683483				0.00470241
2153	Gray wolf	Michigan	4	Male		46.3533	-86.2096	0.0573943	0/1/0	Reference	Gray wolf	Gray wolf	Great_Lakes_CLU	0.0775928	0.118054	0.120871	0.683483				0.0520775
2157	Gray wolf	Michigan	4	Male		46.2664	-86.1679	0.402785	//												0.396126
2144	Gray wolf	Michigan	5	Female		46.5429	-90.2907	0.065473	0/1/0	Reference	Gray wolf	Gray wolf	Great_Lakes_CLU	0.0775928	0.118054	0.120871	0.683483				0.0619736
2147	Gray wolf	Michigan	6	Male		46.6865	-88.6053	0.0388859	0/1/0	Reference	Gray wolf	Gray wolf	Great_Lakes_CLU	0.0775928	0.118054	0.120871	0.683483				0.0364964
2148	Gray wolf	Michigan	6	Male		46.9172	-88.2245	0.0101887	0/1/0	Reference	Gray wolf	Gray wolf	Great_Lakes_CLU	0.0775928	0.118054	0.120871	0.683483				0.00919427
2149	Gray wolf	Michigan	6	Female		46.801	-88.583	0.0290589	0/1/0	Reference	Gray wolf	Gray wolf	Great_Lakes_CLU	0.0775928	0.118054	0.120871	0.683483				0.0264599
2159	Gray wolf	Michigan	6	Male		46.7866	-88.541	0.00217037	0/1/0	Reference	Gray wolf	Gray wolf	Great_Lakes_CLU	0.0775928	0.118054	0.120871	0.683483				0.00175463
2161	Gray wolf	Michigan	6	Male		46.5861	-88.4392	0.0242961	0/1/0	Reference	Gray wolf	Gray wolf	Great_Lakes_CLU	0.0775928	0.118054	0.120871	0.683483				0.0207047
2158	Gray wolf	Michigan	7	Female		46.6146	-87.6873	0.0541388	0/1/0	Reference	Gray wolf	Gray wolf	Great_Lakes_CLU	0.0775928	0.118054	0.120871	0.683483				0.0501123
2156	Gray wolf	Michigan	8	Female		47.0619	-88.3938	0.363719	//												0.357805
2193	Gray wolf	Minnesota	9	Female		47.4624	-95.4563	0.0162778	0/1/0	Reference	Gray wolf	Gray wolf	Great_Lakes_CLU	0.0775928	0.118054	0.120871	0.683483				0.0138265
2194	Gray wolf	Minnesota	9	Male		47.8978	-95.5271	0.00566709	0/1/0	Reference	Gray wolf	Gray wolf	Great_Lakes_CLU	0.0775928	0.118054	0.120871	0.683483				0.00449186
2195	Gray wolf	Minnesota	9	Male		47.7391	-95.784	0.0229095	0/1/0	Reference	Gray wolf	Gray wolf	Great_Lakes_CLU	0.0775928	0.118054	0.120871	0.683483				0.0201432
2198	Gray wolf	Minnesota	10	Female		47.8476	-93.4991	0.00500392	0/1/0	Reference	Gray wolf	Gray wolf	Great_Lakes_CLU	0.0775928	0.118054	0.120871	0.683483				0.00421112
2173	Gray wolf	Minnesota	11	Male		48.3024	-95.3256	0.01465	0/1/0	Reference	Gray wolf	Gray wolf	Great_Lakes_CLU	0.0775928	0.118054	0.120871	0.683483				0.0133352
2174	Gray wolf	Minnesota	11	Female		48.3024	-95.3256	0.0121782	0/1/0	Reference	Gray wolf	Gray wolf	Great_Lakes_CLU	0.0775928	0.118054	0.120871	0.683483				0.0108787
2169	Gray wolf	Minnesota	12	Female		48.3525	-93.4547	0.00470248	0/1/0	Reference	Gray wolf	Gray wolf	Great_Lakes_CLU	0.0775928	0.118054	0.120871	0.683483				0.00371982
2171	Gray wolf	Minnesota	12	Male		48.3525	-93.4547	0.0285766	0/1/0	Reference	Gray wolf	Gray wolf	Great_Lakes_CLU	0.0775928	0.118054	0.120871	0.683483				0.0252667
2172	Gray wolf	Minnesota	12	Female		48.3525	-93.4547	0.00572738	0/1/0	Reference	Gray wolf	Gray wolf	Great_Lakes_CLU	0.0775928	0.118054	0.120871	0.683483				0.00519371
2196	Gray wolf	Minnesota	13	Female		48.6777	-94.289	0.0051245	0/1/0	Reference	Gray wolf	Gray wolf	Great_Lakes_CLU	0.0775928	0.118054	0.120871	0.683483				0.00449186
2197	Gray wolf	Minnesota	13	Female		48.6777	-94.289	0.0164587	0/1/0	Reference	Gray wolf	Gray wolf	Great_Lakes_CLU	0.0775928	0.118054	0.120871	0.683483				0.0139669
2817	Gray wolf	Minnesota	14	Unknown	2014	45.84	-94.7842	0.00651112	0/1/0	Reference	Gray wolf	Gray wolf	Great_Lakes_CLU	0.0859155	0.121767	0.117926	0.674392				0.00554464
2818	Gray wolf	Minnesota	14	Unknown	2014	45.84	-94.7842	0.00434075	0/1/0	Reference	Gray wolf	Gray wolf	Great_Lakes_CLU	0.0859155	0.121767	0.117926	0.674392				0.00357945
2819	Gray wolf	Minnesota	14	Unknown	2014	45.84	-94.7842	0.00138663	0/1/0	Reference	Gray wolf	Gray wolf	Great_Lakes_CLU	0.0859155	0.121767	0.117926	0.674392				0.00112296
2820	Gray wolf	Minnesota	14	Unknown	2014	45.84	-94.7842	0.00108519	0/1/0	Reference	Gray wolf	Gray wolf	Great_Lakes_CLU	0.0859155	0.121767	0.117926	0.674392				0.000772038
2821	Gray wolf	Minnesota	14	Unknown	2014	45.84	-94.7842	0.00223066	0/1/0	Reference	Gray wolf	Gray wolf	Great_Lakes_CLU	0.0859155	0.121767	0.117926	0.674392				0.00168445
2822	Gray wolf	Minnesota	14	Unknown	2014	45.84	-94.7842	0.026768	0/1/0	Reference	Gray wolf	Gray wolf	Great_Lakes_CLU	0.0859155	0.121767	0.117926	0.674392				0.0207748
2826	Gray wolf	Minnesota	14	Unknown	2014	45.84	-94.7842	0.262676	//												0.246491
7300	Gray wolf	Ontario	15	Male		46.0777	-81.1323	0.00675228	0/1/0	Reference	Gray wolf	Gray wolf	SE_Ontario_CLU	0.0787452	0.116901	0.12023	0.684123	0	0.0524925	0.947507	0.00645705
7351	Gray wolf	Ontario	15	Female		46.4134	-81.3789	0.00066317	0.511/0.489/0		Gray wolf	Eastern wolf	SE_Ontario_CLU	0.0775928	0.118054	0.120871	0.683483	0	0.0524925	0.947507	0.000631668
7413	Gray wolf	Ontario	15	Male		46.1289	-81.0927	0.007114	0.899/0.101/0		Eastern wolf	Gray wolf	SE_Ontario_CLU	0.0720871	0.160819	0.598592	0.168502	0	0.0524925	0.947507	0.00596575
7415	Gray wolf	Ontario	15	Male		46.1733	-81.1608	0.00397902	0.431/0.418/0.151		Eastern wolf	Eastern wolf	SE_Ontario_CLU	0.0788732	0.124712	0.344686	0.451729	0	0.0524925	0.947507	0.00364964
7344	Gray wolf	Ontario	16	Female		46.1465	-80.8911	0.0594441	1/0/0		Eastern wolf	Gray wolf	SE_Ontario_CLU	0.0720871	0.160819	0.598592	0.168502	0	0.0524925	0.947507	0.0563588
7336	Gray wolf	Ontario	17	Female		46.6034	-81.0485	0.00681256	0.508/0.492/0		Gray wolf	Eastern wolf	SE_Ontario_CLU	0.0775928	0.118054	0.120871	0.683483	0	0.0524925	0.947507	0.00575519
7407	Gray wolf	Ontario	17	Female		46.6122	-81.0555	0.0105504	0.424/0.576/0		Gray wolf	Gray wolf	SE_Ontario_CLU	0.0775928	0.118054	0.120871	0.683483	0	0.0524925	0.947507	0.00947501
7320	Gray wolf	Ontario	18	Female		46.6493	-79.0875	0.0443721	0.126/0.874/0		Gray wolf	Gray wolf	SE_Ontario_CLU	0.0720871	0.161076	0.598464	0.168374	0	0.0524925	0.947507	0.0384615
7330	Gray wolf	Ontario	19	Female		47.3933	-81.4764	0.392114	//												0.374228
7411	Gray wolf	Ontario	19	Female		47.3384	-81.5583	0.0157955	0.438/0.562/0		Gray wolf	Eastern wolf	SE_Ontario_CLU	0.0775928	0.118054	0.120871	0.683483	0	0.0524925	0.947507	0.0136861
7412	Gray wolf	Ontario	19	Female		47.3925	-81.5644	0.0106107	0.242/0.758/0		Gray wolf	Eastern wolf	SE_Ontario_CLU	0.0775928	0.118054	0.120871	0.683483	0	0.0524925	0.947507	0.00842223
7414	Gray wolf	Ontario	19	Female		47.5293	-81.8736	0.00144692	0.24/0.76/0		Gray wolf	Gray wolf	SE_Ontario_CLU	0.0775928	0.118054	0.120871	0.683483	0	0.0524925	0.947507	0.00105278
7354	Gray wolf	Ontario	20	Male		47.8744	-83.3449	0.119129	0.082/0.918/0	Reference	Gray wolf	Gray wolf	SE_Ontario_CLU	0.0775928	0.118054	0.120871	0.683483				0.105138
7343	Gray wolf	Ontario	21	Female		48.6777	-89.4976	0.018629	0/1/0	Reference	Gray wolf	Gray wolf	Great_Lakes_CLU	0.0775928	0.118054	0.120871	0.683483				0.017055
7422	Gray wolf	Ontario	21	Male		48.4088	-89.3007	0.0666184	0/1/0	Reference	Gray wolf	Gray wolf	Great_Lakes_CLU	0.0775928	0.118054	0.120871	0.683483				0.0616929
7293	Gray wolf	Ontario	22	Male		49.2786	-81.1028	0.0185085	0.087/0.913/0	Reference	Gray wolf	Gray wolf	SE_Ontario_CLU	0.0775928	0.118054	0.120871	0.683483				0.0160022
7294	Gray wolf	Ontario	22	Female		49.2932	-81.5174	0.0294206	0.058/0/0.942		Coyote	Coyote	SE_Ontario_CLU	0.0775928	0.118054	0.120871	0.683483				0.0270915
7295	Gray wolf	Ontario	22	Male		49.2982	-80.7222	0.0345451	0.188/0.812/0		Gray wolf	Gray wolf	SE_Ontario_CLU	0.0775928	0.118054	0.120871	0.683483				0.0318641
7333	Gray wolf	Ontario	22	Female		49.2882	-81.2465	0.0316513	0.085/0.915/0	Reference	Gray wolf	Gray wolf	SE_Ontario_CLU	0.0775928	0.118054	0.120871	0.683483				0.0275126
7339	Gray wolf	Ontario	22	Female		49.2984	-81.1732	0.247845	0.095/0.905/0	Reference	Gray wolf	Gray wolf	SE_Ontario_CLU	0.0775928	0.118054	0.120871	0.683483				0.230418
7379	Gray wolf	Ontario	22	Male		49.2308	-81.1721	0.0198951	0.38/0.62/0		Gray wolf	Gray wolf	SE_Ontario_CLU	0.0775928	0.118054	0.120871	0.683483				0.0173358
7400	Gray wolf	Ontario	22	Female		48.6587	-80.6588	0.0922409	0.388/0.612/0		Gray wolf	Coyote	SE_Ontario_CLU	0.0775928	0.118054	0.120871	0.683483				0.0847838
7402	Gray wolf	Ontario	22	Male		48.6999	-80.6153	0.0505215	0.452/0.548/0		Gray wolf	Gray wolf	SE_Ontario_CLU	0.0775928	0.118054	0.120871	0.683483				0.0423217
7410	Gray wolf	Ontario	22	Male		49.2171	-80.837	0.314885	//												0.295059
7418	Gray wolf	Ontario	22	Female		49.2965	-80.8379	0.304757	//												0.283198
7325	Gray wolf	Ontario	23	Male		48.7614	-91.8472	0.060469	0/1/0	Reference	Gray wolf	Gray wolf	Great_Lakes_CLU	0.0775928	0.118054	0.120871	0.683483				0.0574116
7383	Gray wolf	Ontario	23	Male		48.7658	-91.6222	0.0157955	0/1/0	Reference	Gray wolf	Gray wolf	Great_Lakes_CLU	0.0775928	0.118054	0.120871	0.683483				0.0150197
7384	Gray wolf	Ontario	23	Female		49.0672	-91.5336	0.302948	//												0.283549
7391	Gray wolf	Ontario	23	Male		48.7498	-91.8299	0.100681	0/1/0	Reference	Gray wolf	Gray wolf	Great_Lakes_CLU	0.0775928	0.118054	0.120871	0.683483				0.0923638
7421	Gray wolf	Ontario	23	Female		48.9376	-91.6397	0.0724061	0/1/0	Reference	Gray wolf	Gray wolf	Great_Lakes_CLU	0.0775928	0.118054	0.120871	0.683483				0.066676
7423	Gray wolf	Ontario	23	Male		49.0872	-91.5341	0.024055	0/1/0	Reference	Gray wolf	Gray wolf	Great_Lakes_CLU	0.0775928	0.118054	0.120871	0.683483				0.0209854
7406	Gray wolf	Ontario	24	Male		48.8145	-93.9364	0.0363538	0/1/0	Reference	Gray wolf	Gray wolf	Great_Lakes_CLU	0.0775928	0.118054	0.120871	0.683483				0.032566
7318	Gray wolf	Ontario	25	Female		48.9508	-88.3337	0.0598059	0/1/0	Reference	Gray wolf	Gray wolf	Great_Lakes_CLU	0.0775928	0.118054	0.120871	0.683483				0.0533408
7342	Gray wolf	Ontario	26	Male		49.4202	-91.6034	0.0491952	0.11/0.89/0		Gray wolf	Eastern wolf	Great_Lakes_CLU	0.0775928	0.118054	0.120871	0.683483				0.0457608
7311	Gray wolf	Ontario	27	Female		49.785	-94.5519	0.0056068	0.078/0.922/0	Reference	Gray wolf	Gray wolf	Great_Lakes_CLU	0.0775928	0.118054	0.120871	0.683483				0.00533408
7380	Gray wolf	Ontario	27	Female		49.5939	-94.2874	0.00928438	0/1/0	Reference	Gray wolf	Gray wolf	Great_Lakes_CLU	0.0775928	0.118054	0.120871	0.683483				0.00786075
7382	Gray wolf	Ontario	27	Female		49.7122	-94.8089	0.020498	0/1/0	Reference	Gray wolf	Gray wolf	Great_Lakes_CLU	0.0775928	0.118054	0.120871	0.683483				0.0176165
7424	Gray wolf	Ontario	28	Male		49.6751	-81.0461	0.0440104	0.227/0.773/0		Gray wolf	Gray wolf	SE_Ontario_CLU	0.0775928	0.118054	0.120871	0.683483				0.0402864
7346	Gray wolf	Ontario	29	Male		49.77	-83.97	0.161572	0.192/0.808/0		Gray wolf	Gray wolf	SE_Ontario_CLU	0.0775928	0.118054	0.120871	0.683483				0.148372
7347	Gray wolf	Ontario	29	Male		49.78	-83.99	0.0800024	0.221/0.779/0		Gray wolf	Gray wolf	SE_Ontario_CLU	0.0775928	0.118054	0.120871	0.683483				0.0764318
7348	Gray wolf	Ontario	29	Female		49.7387	-83.6542	0.0215229	0/1/0	Reference	Gray wolf	Gray wolf	SE_Ontario_CLU	0.0775928	0.118054	0.120871	0.683483				0.0185991
7349	Gray wolf	Ontario	29	Female		49.8206	-83.6517	0.0549828	0/1/0	Reference	Gray wolf	Gray wolf	SE_Ontario_CLU	0.0775928	0.118054	0.120871	0.683483				0.0506738
7350	Gray wolf	Ontario	29	Female		49.8206	-83.5798	0.024899	0/1/0	Reference	Gray wolf	Gray wolf	SE_Ontario_CLU	0.0775928	0.118054	0.120871	0.683483				0.0220382
7405	Gray wolf	Ontario	29	Male		49.8255	-83.5003	0.0217037	0/1/0	Reference	Gray wolf	Gray wolf	SE_Ontario_CLU	0.0775928	0.118054	0.120871	0.683483				0.0200028
7292	Gray wolf	Ontario	30	Male		49.7397	-86.597	0.020076	0/1/0	Reference	Gray wolf	Gray wolf	SE_Ontario_CLU	0.0775928	0.118054	0.120871	0.683483				0.0176867
7381	Gray wolf	Ontario	30	Female		49.8318	-86.4865	0.0327968	0/1/0	Reference	Gray wolf	Gray wolf	SE_Ontario_CLU	0.0775928	0.118054	0.120871	0.683483				0.0288462
7420	Gray wolf	Ontario	30	Male		49.8077	-86.6169	0.0312896	0/1/0	Reference	Gray wolf	Gray wolf	SE_Ontario_CLU	0.0775928	0.118054	0.120871	0.683483				0.0281443
7352	Gray wolf	Ontario	31	Male		50.4042	-83.1456	0.00235124	0/1/0	Reference	Gray wolf	Gray wolf	SE_Ontario_CLU	0.0775928	0.118054	0.120871	0.683483				0.001895
7398	Gray wolf	Ontario	32	Female		51.0235	-93.8442	0.0504612	0.105/0.895/0		Gray wolf	Gray wolf	SE_Ontario_CLU	0.0775928	0.118054	0.120871	0.683483				0.0461117
2229	Gray wolf	Ontario	33	Female		49.0964	-81.0359	0.176343	0.208/0.792/0		Gray wolf	Eastern wolf	SE_Ontario_CLU	0.0775928	0.118054	0.120871	0.683483				0.165707
2230	Gray wolf	Ontario	33	Female		49.3938	-81.1745	0.289926	//												0.278636
2231	Gray wolf	Ontario	34	Male		47.5591	-79.7651	0.0121179	0.322/0.678/0		Gray wolf	Eastern wolf	SE_Ontario_CLU	0.0720871	0.161076	0.598464	0.168374	0	0.0524925	0.947507	0.0104576
2244	Gray wolf	Ontario	34	Male		47.6025	-79.8614	0.119069	0.436/0.564/0		Gray wolf	Gray wolf	SE_Ontario_CLU	0.0720871	0.161076	0.598464	0.168374	0	0.0524925	0.947507	0.107313
2337	Gray wolf	Wisconsin	35	Male		46.6878	-91.6867	0.00633026	0/1/0	Reference	Gray wolf	Gray wolf	Great_Lakes_CLU	0.0775928	0.118054	0.120871	0.683483				0.00484278
2338	Gray wolf	Wisconsin	35	Male		46.6578	-91.6865	0.00596853	0/0/1		Coyote	Coyote	Great_Lakes_CLU	0.630858	0.1242	0.166965	0.077977				0.00547445
2339	Gray wolf	Wisconsin	35	Male		46.6283	-91.9191	0.025321	0/1/0	Reference	Gray wolf	Gray wolf	Great_Lakes_CLU	0.135851	0.113444	0.117542	0.633163				0.0225295
2340	Gray wolf	Wisconsin	35	Male		46.6273	-91.9164	0.00994755	0/1/0	Reference	Gray wolf	Gray wolf	Great_Lakes_CLU	0.138284	0.111908	0.118438	0.63137				0.00856261
2328	Gray wolf	Wisconsin	36	Male		43.15	-90.35	0.010671	0/1/0	Reference	Gray wolf	Gray wolf	Great_Lakes_CLU	0.0778489	0.117926	0.120871	0.683355				0.00835205
2330	Gray wolf	Wisconsin	37	Female		45.5883	-90.602	0.297763	//												0.278495
8655	Unknown	Ontario	1	Unknown	2016-2017	44.2934	-76.669	0.0377404	0.127/0/0.873		Coyote	Coyote	SE_Ontario_UNK	0.219206	0.597055	0.113444	0.0702945	0.947507	0	0.0524925	0.0343908
8656	Unknown	Ontario	1	Unknown	2016-2017	44.2934	-76.669	0.157352	0.061/0.044/0.895		Coyote	Coyote	SE_Ontario_UNK	0.219206	0.597055	0.113444	0.0702945	0.947507	0	0.0524925	0.149074
8659	Unknown	Ontario	1	Unknown	2016-2017	44.2934	-76.669	0.133116	0.37/0/0.63		Coyote	Coyote	SE_Ontario_UNK	0.219206	0.597055	0.113444	0.0702945	0.947507	0	0.0524925	0.125351
8661	Unknown	Ontario	1	Unknown	2016-2017	44.2934	-76.669	0.172424	0/0/1		Coyote	Coyote	SE_Ontario_UNK	0.219206	0.597055	0.113444	0.0702945	0.947507	0	0.0524925	0.162268
8662	Unknown	Ontario	1	Unknown	2016-2017	44.2934	-76.669	0.00910351	0/0/1		Coyote	Coyote	SE_Ontario_UNK	0.219206	0.597055	0.113444	0.0702945	0.947507	0	0.0524925	0.00750983
8663	Unknown	Ontario	1	Unknown	2016-2017	44.2934	-76.669	0.0236933	0.109/0/0.891		Coyote	Coyote	SE_Ontario_UNK	0.219206	0.597055	0.113444	0.0702945	0.947507	0	0.0524925	0.0211258
8664	Unknown	Ontario	1	Unknown	2016-2017	44.2934	-76.669	0.0491349	0/0/1		Coyote	Coyote	SE_Ontario_UNK	0.219206	0.597055	0.113444	0.0702945	0.947507	0	0.0524925	0.0454801
8645	Unknown	Ontario	2	Unknown	2016-2017	45.6045	-80.3776	0.0246579	0.288/0/0.712		Coyote	Gray wolf	SE_Ontario_UNK	0.0720871	0.161076	0.598464	0.168374	0.0439926	0.956007	0	0.0209854
8647	Unknown	Ontario	2	Unknown	2016-2017	45.6045	-80.3776	0.0839814	1/0/0		Eastern wolf	Eastern wolf	SE_Ontario_UNK	0.0720871	0.161076	0.598464	0.168374	0.0439926	0.956007	0	0.0784672
8654	Unknown	Ontario	3	Unknown	2016-2017	43.1609	-80.6619	0.00705372	0/0/1		Coyote	Coyote	SE_Ontario_UNK	0.219206	0.597055	0.113444	0.0702945				0.00652723
8605	Unknown	Ontario	4	Unknown	2016-2017	43.9899	-81.2473	0.032435	0/0/1		Coyote	Coyote	SE_Ontario_UNK	0.219206	0.597055	0.113444	0.0702945				0.0273723
8607	Unknown	Ontario	4	Unknown	2016-2017	44.0077	-81.3035	0.0708989	0.033/0/0.967		Coyote	Coyote	SE_Ontario_UNK	0.219206	0.597055	0.113444	0.0702945				0.0654829
8608	Unknown	Ontario	4	Unknown	2016-2017	43.7449	-81.7043	0.0134443	0.039/0/0.961		Coyote	Coyote	SE_Ontario_UNK	0.219206	0.597055	0.113444	0.0702945				0.0122824
8606	Unknown	Ontario	5	Unknown	2016-2017	43.624	-81.5463	0.00361729	0/0/1		Coyote	Coyote	SE_Ontario_UNK	0.219206	0.597055	0.113444	0.0702945				0.00315834
8649	Unknown	Ontario	6	Unknown	2016-2017	44.3119	-80.0856	0.0455176	0/0/1		Coyote	Coyote	SE_Ontario_UNK	0.219206	0.597055	0.113444	0.0702945	0.947507	0	0.0524925	0.0415497
8650	Unknown	Ontario	6	Unknown	2016-2017	44.3119	-80.0856	0.0145295	0.033/0/0.967		Coyote	Coyote	SE_Ontario_UNK	0.219206	0.597055	0.113444	0.0702945	0.947507	0	0.0524925	0.0131246
8651	Unknown	Ontario	6	Unknown	2016-2017	44.3119	-80.0856	0.0555857	0/0/1		Coyote	Coyote	SE_Ontario_UNK	0.219206	0.597055	0.113444	0.0702945	0.947507	0	0.0524925	0.0506036
8652	Unknown	Ontario	6	Unknown	2016-2017	44.3119	-80.0856	0.0220052	0/0/1		Coyote	Coyote	SE_Ontario_UNK	0.219206	0.597055	0.113444	0.0702945	0.947507	0	0.0524925	0.0198624
8623	Unknown	Ontario	7	Unknown	2016-2017	44.6522	-76.722	0.00850063	0.209/0/0.791		Coyote	Coyote	SE_Ontario_UNK	0.219206	0.597055	0.113444	0.0702945	0.947507	0	0.0524925	0.00729927
8624	Unknown	Ontario	7	Unknown	2016-2017	44.7041	-75.9975	0.058359	0/0/1		Coyote	Coyote	SE_Ontario_UNK	0.219206	0.597055	0.113444	0.0702945	0.947507	0	0.0524925	0.054183
8626	Unknown	Ontario	7	Unknown	2016-2017	44.7041	-75.9975	0.129559	0/0/1		Coyote	Coyote	SE_Ontario_UNK	0.219206	0.597055	0.113444	0.0702945	0.947507	0	0.0524925	0.125421
8658	Unknown	Ontario	8	Unknown	2016-2017	45.5142	-76.5903	0.0105504	0.009/0/0.991		Coyote	Coyote	SE_Ontario_UNK	0.210115	0.581434	0.126889	0.0815621	0.947507	0	0.0524925	0.00961538
8660	Unknown	Ontario	8	Unknown	2016-2017	45.5142	-76.5903	0.0247784	0/0/1		Coyote	Coyote	SE_Ontario_UNK	0.210115	0.581434	0.126889	0.0815621	0.947507	0	0.0524925	0.0225295
8674	Unknown	Ontario	8	Unknown	2016-2017	45.5725	-76.6906	0.00566709	0.08/0/0.92		Coyote	Coyote	SE_Ontario_UNK	0.210115	0.581434	0.126889	0.0815621	0.947507	0	0.0524925	0.00491297
8628	Unknown	Ontario	9	Unknown	2016-2017	45.6823	-79.9683	0.030325	0.335/0/0.665		Coyote	Coyote	SE_Ontario_UNK	0.0720871	0.161076	0.598464	0.168374	0.632208	0.3153	0.0524925	0.027653
8629	Unknown	Ontario	9	Unknown	2016-2017	45.6823	-79.9683	0.0695726	0.604/0/0.396		Eastern wolf	Eastern wolf	SE_Ontario_UNK	0.0720871	0.161076	0.598464	0.168374	0.632208	0.3153	0.0524925	0.0630966
8630	Unknown	Ontario	9	Unknown	2016-2017	45.6823	-79.9683	0.00657141	0.176/0/0.824		Coyote	Coyote	SE_Ontario_UNK	0.0720871	0.161076	0.598464	0.168374	0.632208	0.3153	0.0524925	0.00596575
8603	Unknown	Ontario	10	Unknown	2016-2017	46.7515	-84.3383	0.0300838	0/0.045/0.955		Coyote	Coyote	SE_Ontario_UNK	0.0775928	0.118054	0.120871	0.683483				0.028425
8604	Unknown	Ontario	10	Unknown	2016-2017	46.7515	-84.3383	0.00946524	0.431/0.568/0		Gray wolf	Gray wolf	SE_Ontario_UNK	0.0775928	0.118054	0.120871	0.683483				0.00856261
8644	Unknown	Ontario	11	Unknown	2016-2017	44.8204	-78.9321	0.0326762	0.04/0/0.96		Coyote	Coyote	SE_Ontario_UNK	0.219206	0.597055	0.113444	0.0702945	0.947507	0	0.0524925	0.0291269
8610	Unknown	Ontario	12	Unknown	2016-2017	44.2672	-78.8107	0.0121782	0/0/1		Coyote	Coyote	SE_Ontario_UNK	0.219206	0.597055	0.113444	0.0702945	0.947507	0	0.0524925	0.010598
8611	Unknown	Ontario	12	Unknown	2016-2017	44.2672	-78.8107	0.0724061	0/0/1		Coyote	Coyote	SE_Ontario_UNK	0.219206	0.597055	0.113444	0.0702945	0.947507	0	0.0524925	0.066676
8613	Unknown	Ontario	12	Unknown	2016-2017	44.2672	-78.8107	0.170736	0/0/1		Coyote	Coyote	SE_Ontario_UNK	0.219206	0.597055	0.113444	0.0702945	0.947507	0	0.0524925	0.163181
8614	Unknown	Ontario	12	Unknown	2016-2017	44.2672	-78.8107	0.00626997	0.078/0/0.922		Coyote	Coyote	SE_Ontario_UNK	0.219206	0.597055	0.113444	0.0702945	0.947507	0	0.0524925	0.00554464
8616	Unknown	Ontario	12	Unknown	2016-2017	44.2672	-78.8107	0.0393079	0.096/0/0.904		Coyote	Coyote	SE_Ontario_UNK	0.219206	0.597055	0.113444	0.0702945	0.947507	0	0.0524925	0.0367771
8618	Unknown	Ontario	12	Unknown	2016-2017	44.2672	-78.8107	0.0051245	0.081/0/0.919		Coyote	Coyote	SE_Ontario_UNK	0.219206	0.597055	0.113444	0.0702945	0.947507	0	0.0524925	0.00357945
8620	Unknown	Ontario	12	Unknown	2016-2017	44.2672	-78.8107	0.013384	0/0/1		Coyote	Coyote	SE_Ontario_UNK	0.219206	0.597055	0.113444	0.0702945	0.947507	0	0.0524925	0.0117911
8621	Unknown	Ontario	12	Unknown	2016-2017	44.2672	-78.8107	0.00235124	0/0/1		Coyote	Coyote	SE_Ontario_UNK	0.219206	0.597055	0.113444	0.0702945	0.947507	0	0.0524925	0.00196519
8634	Unknown	Ontario	13	Unknown	2016-2017	44.6281	-79.4504	0.063182	0.038/0/0.962		Coyote	Coyote	SE_Ontario_UNK	0.219206	0.597055	0.113444	0.0702945	0.947507	0	0.0524925	0.057201
8635	Unknown	Ontario	13	Unknown	2016-2017	44.6281	-79.4504	0.0467836	0/0/1		Coyote	Coyote	SE_Ontario_UNK	0.219206	0.597055	0.113444	0.0702945	0.947507	0	0.0524925	0.0423919
8636	Unknown	Ontario	13	Unknown	2016-2017	44.6281	-79.4504	0.083258	0/0/1		Coyote	Coyote	SE_Ontario_UNK	0.219206	0.597055	0.113444	0.0702945	0.947507	0	0.0524925	0.0790286
8637	Unknown	Ontario	13	Unknown	2016-2017	44.6281	-79.4504	0.0211612	0/0/1		Coyote	Coyote	SE_Ontario_UNK	0.219206	0.597055	0.113444	0.0702945	0.947507	0	0.0524925	0.0187395
8638	Unknown	Ontario	13	Unknown	2016-2017	44.6281	-79.4504	0.0353892	0/0/1		Coyote	Coyote	SE_Ontario_UNK	0.219206	0.597055	0.113444	0.0702945	0.947507	0	0.0524925	0.0320045
8639	Unknown	Ontario	13	Unknown	2016-2017	44.6281	-79.4504	0.0412974	0.086/0/0.914		Coyote	Coyote	SE_Ontario_UNK	0.219206	0.597055	0.113444	0.0702945	0.947507	0	0.0524925	0.0388125
8640	Unknown	Ontario	13	Unknown	2016-2017	44.6281	-79.4504	0.0517273	0.039/0/0.961		Coyote	Coyote	SE_Ontario_UNK	0.219206	0.597055	0.113444	0.0702945	0.947507	0	0.0524925	0.0462521
8641	Unknown	Ontario	13	Unknown	2016-2017	44.6281	-79.4504	0.00657141	0/0/1		Coyote	Coyote	SE_Ontario_UNK	0.219206	0.597055	0.113444	0.0702945	0.947507	0	0.0524925	0.00575519
8642	Unknown	Ontario	13	Unknown	2016-2017	44.6281	-79.4504	0.018629	0.032/0/0.968		Coyote	Coyote	SE_Ontario_UNK	0.219206	0.597055	0.113444	0.0702945	0.947507	0	0.0524925	0.0158619
8643	Unknown	Ontario	13	Unknown	2016-2017	44.6281	-79.4504	0.140592	0/0/1		Coyote	Coyote	SE_Ontario_UNK	0.219206	0.597055	0.113444	0.0702945	0.947507	0	0.0524925	0.133843
8648	Unknown	Ontario	13	Unknown	2016-2017	44.7143	-79.6346	0.108278	0.108/0/0.892		Coyote	Coyote	SE_Ontario_UNK	0.219206	0.597055	0.113444	0.0702945	0.947507	0	0.0524925	0.102751
8633	Unknown	Ontario	14	Unknown	2016-2017	44.1814	-76.905	0.0680654	0.079/0/0.921		Coyote	Gray wolf	SE_Ontario_UNK	0.219206	0.597055	0.113444	0.0702945	0.947507	0	0.0524925	0.0651319
8632	Unknown	Ontario	15	Unknown	2016-2017	42.7164	-81.3608	0.0335202	0/0/1		Coyote	Coyote	SE_Ontario_UNK	0.219206	0.597055	0.113444	0.0702945				0.028776
